# Supplementary material for: Concentration, source identification and potential human health risk assessment of heavy metals in chicken meat and egg in Bangladesh
Source: Research Square preprint supplement (doi:10.21203/rs.3.rs-382137/v1), 2021-04-15
Supplement: Supplementary file 1 [file c40f7ace1d21f8e615f0598f.docx]

**Supplementary information**

**Concentration, source identification and potential human health risk assessment of heavy metals in chicken meat and hen egg in Bangladesh**

Ullah AKM Atique1,2,3*, Shazia Afrin4, Mohammad Mozammal Hosen2, Maesha Musarrat5,Tania Ferdoushy4, Quamrun Nahar6, Shamshad B. Quraishi2,*

1Department of Chemistry, Michigan State University, 578 South Shaw Lane, East Lansing, Michigan 48824, United States

2Analytical Chemistry Laboratory, Chemistry Division, Atomic Energy Centre, Bangladesh Atomic Energy Commission, Dhaka 1000, Bangladesh

3Nanoscience and Technology Research Laboratory, Chemistry Division, Atomic Energy Centre, Bangladesh Atomic Energy Commission, Dhaka 1000, Bangladesh

4Department of Food and Nutrition, College of Home Economics, Dhaka University, Dhaka 1205, Bangladesh

5Institute of Food Science and Technology, Bangladesh Council of Scientific and Industrial Research, Dhaka 1205, Bangladesh

6Department of Biochemistry and Cell Biology, Bangladesh Institute of Research and Rehabilitation in Diabetes Endocrine and Metabolic Disorder (BIRDEM), Dhaka 1000, Bangladesh

*Corresponding authors’ e-mail addresses: ullaha@msu.edu (AKMAU); mumu3222@baec.gov.bd (SBQ)

**Table S1** Analytical conditions for measurement for trace elements in aqueous solution using AAS

| Elements | Wavelength (nm) | Slit width (nm) | Lamp current (mA) | Mode | Limit of Detection (LOD)  (mg/kg) |
| --- | --- | --- | --- | --- | --- |
| Pb | 283.3 | 1.0 | 10.0 | GF-AAS | 0.06 |
| Cd | 228.8 | 0.2 | 7.0 | GF-AAS | 0.02 |
| Cr | 357.9 | 0.5 | 4.0 | GF-AAS | 0.05 |
| As | 193.7 | 0.5 | 10 | HG-AAS | 0.08 |
| Hg | 253.7 | 0.5 | 4.0 | CV-AAS | 0.02 |
| Mn | 279.5 | 0.2 | 7.0 | F – AAS | 0.30 |
| Fe | 248.3 | 0.2 | 6.0 | F – AAS | 0.02 |
| Zn | 213.9 | 0.5 | 4.0 | F – AAS | 0.3 |

**Table S2** Heavy metal concentrations (mean ± SD) in certified reference material (NIST CRM 1566a, Oyster Tissue)

| Heavy metal | Certified value (mg/kg) | Found value (mg/kg) | Mean recovery (%) |
| --- | --- | --- | --- |
| Pb | 0.371 ± 0.014 | 0.365 ± 0.026 | 98.3 |
| Cd | 4.15 ± 0.38 | 3.97 ± 0.24 | 95.7 |
| Cr | 1.43 ± 0.46 | 1.39 ± 0.11 | 96.9 |
| As | 14.0 ± 1.2 | 13.30 ± 0.53 | 94.8 |
| Hg | 0.0642 ± 0.0067 | 0.060 ± 0.005 | 93.5 |
| Mn | 12.3 ± 1.5 | 12.74 ± 0.51 | 103.6 |
| Fe | 539 ± 15 | 546 ± 11 | 101.3 |
| Zn | 830 ± 57 | 867 ± 17 | 104.5 |

**Table S3** Concentration of heavy metals in chicken meat collected from four different wholesale markets of Dhaka, Bangladesh.

| Location | Type of chicken | Concentration of heavy metals (mg/kg) | | | | | | | |
| --- | --- | --- | --- | --- | --- | --- | --- | --- | --- |
| Pb | Cd | Cr | As | Hg | Mn | Fe | Zn |
| Kawranbazar | Broiler | 1.21 ± 0.12 | < 0.02 | 0.16 ± 0.02 | <0.08 | < 0.02 | < 0.3 | 5.40 ± 0.53 | 10.85 ± 1.08 |
| Local | < 0.06 | < 0.02 | 0.14 ± 0.01 | <0.08 | < 0.02 | < 0.3 | 4.38 ± 0.43 | 8.92 ± 0.89 |
| Sonali | 0.71 ± 0.07 | < 0.02 | 0.33 ± 0.03 | <0.08 | < 0.02 | < 0.3 | 2.50 ± 0.24 | 1.02 ± 0.01 |
| Mirpur-1 | Broiler | < 0.06 | < 0.02 | 0.17 ± 0.02 | <0.08 | < 0.02 | < 0.3 | 17.50 ± 1.71 | 9.23 ± 0.92 |
| Local | 0.54 ± 0.05 | < 0.02 | 0.15 ± 0.02 | <0.08 | < 0.02 | 0.33 ±0.03 | 15.46 ± 1.54 | 14.24±1.42 |
| Sonali | 2.73 ± 0.27 | < 0.02 | 0.67 ± 0.07 | <0.08 | < 0.02 | < 0.3 | 10.94 ± 0.10 | 9.32 ± 0.93 |
| New Market | Broiler | < 0.06 | < 0.02 | 0.08 ± 0.01 | <0.08 | < 0.02 | 0.38 ± 0.03 | 25.32 ± 2.53 | 9.03 ± 0.90 |
| Local | 0.13 ± 0.01 | < 0.02 | 0.15 ± 0.01 | <0.08 | < 0.02 | 0.43 ±0.04 | 27.42 ± 2.74 | 19.40 ±1.94 |
| Sonali | 0.62 ± 0.06 | < 0.02 | 0.20 ± 0.02 | <0.08 | < 0.02 | 0.36 ± 0.03 | 20.16 ± 2.01 | 9.66 ± 0.96 |
| Mohammadpur Bazar | Broiler | 1.10 ± 0.11 | < 0.02 | 0.26 ± 0.03 | <0.08 | < 0.02 | 0.56 ±0.05 | 28.56 ± 2.85 | 10.9 ± 1.09 |
| Local | 1.84 ± 0.18 | < 0.02 | 0.27 ± 0.03 | <0.08 | < 0.02 | 0.63 ±0.06 | 24.04 ± 2.40 | 8.87 ± 0.88 |
| Sonali | < 0.06 | < 0.02 | 0.07 ± 0.01 | <0.08 | < 0.02 | 0.51 ±0.05 | 20.62 ± 2.06 | 12.78 ±1.27 |

**Table S4** Concentration of heavy metals in hen egg collected from four different wholesale markets of Dhaka, Bangladesh.

| Location | Types of Egg | Concentrations of heavy metals (mg/kg) | | | | | | | |
| --- | --- | --- | --- | --- | --- | --- | --- | --- | --- |
| Pb | Cd | Cr | As | Hg | Mn | Fe | Zn |
| Kawranbazar | Layer | < 0.06 | < 0.02 | < 0.05 | <0.08 | < 0.02 | < 0.3 | 15.02 ± 1.50 | 7.96 ± 0.79 |
|  | Local | < 0.06 | < 0.02 | < 0.05 | <0.08 | < 0.02 | < 0.3 | 22.28 ± 2.22 | 12.18 ± 1.21 |
| Mirpur 1 | Layer | 0.16 ± 0.02 | < 0.02 | < 0.05 | <0.08 | < 0.02 | < 0.3 | 6.82 ± 0.68 | 10.74 ± 1.07 |
|  | Local | 0.68 ± 0.07 | < 0.02 | < 0.05 | <0.08 | < 0.02 | < 0.3 | 11.61 ±1.16 | 11.33 ± 1.13 |
| New Market | Layer | 0.09 ±0.01 | < 0.02 | 0.05 ± 0.01 | <0.08 | < 0.02 | < 0.3 | 22.37 ± 2.23 | 11.39 ± 1.13 |
|  | Local | 0.23 ± 0.02 | < 0.02 | < 0.05 | <0.08 | < 0.02 | < 0.3 | 24.65 ± 2.46 | 10.50 ± 1.05 |
| Mohammadpur Bazar | Layer | 0.13 ± 0.01 | < 0.02 | < 0.05 | <0.08 | < 0.02 | < 0.3 | 7.44 ± 0.74 | 10.45 ± 1.04 |
|  | Local | < 0.06 | < 0.02 | 0.06 ± 0.01 | <0.08 | < 0.02 | < 0.3 | 14.63 ± 1.46 | 12.82 ± 1.28 |
| Shapna | Organic | < 0.06 | < 0.02 | < 0.05 | <0.08 | < 0.02 | < 0.3 | 19.68 ± 1.96 | 10.89 ± 1.08 |
| G-Mart | Organic | < 0.06 | < 0.02 | < 0.05 | <0.08 | < 0.02 | < 0.3 | 38.64 ± 3.86 | 15.38 ± 1.53 |
| Meena Bazar | Organic | 0.07 ± 0.01 | < 0.02 | < 0.05 | <0.08 | < 0.02 | < 0.3 | 24.11 ± 2.41 | 11.91 ± 1.19 |
| Agora | Organic | 0.09 ± 0.01 | < 0.02 | < 0.05 | <0.08 | < 0.02 | < 0.3 | 20.20 ± 2.02 | 11.48 ± 1.14 |

**Table S5** Principal component loadings (varimax-normalized) and communalities for heavy metals in chicken meat and egg samples (n = 24).

| Heavy metals | PC1 | PC2 | PC3 | Communalities |
| --- | --- | --- | --- | --- |
| Pb | 0.444 | 0.783 | 0.297 | 0.899 |
| Cd | 0.947 | -0.274 | 0.159 | 0.996 |
| Cr | 0.290 | 0.889 | 0.150 | 0.897 |
| As | 0.947 | -0.274 | 0.159 | 0.996 |
| Hg | 0.947 | -0.274 | 0.159 | 0.996 |
| Mn | -0.179 | 0.322 | 0.748 | 0.695 |
| Fe | -0.516 | -0.225 | 0.678 | 0.777 |
| Zn | -0.224 | -0.508 | 0.637 | 0.714 |
| Eigen value | 3.317 | 2.041 | 1.612 |  |
| % of total variance | 41.461 | 25.515 | 20.146 |  |
| Cumulative % of variance | 41.461 | 66.976 | 87.122 |  |

**Table S6** Comparison of the estimated daily intake of heavy metals through the consumption of chicken meat and egg with the maximum tolerable daily intake.

| Food items | Estimated daily intake of heavy metals (mg/kg-bw/day) | | | | | | | |
| --- | --- | --- | --- | --- | --- | --- | --- | --- |
| Pb | Cd | Cr | As | Hg | Mn | Fe | Zn |
| **Chicken meat** | | | | | | | | |
| Broiler | 1.70E-04 | 2.89E-06 | 4.91E-05 | 1.16E-05 | 2.89E-06 | 8.95E-05 | 5.55E-03 | 2.83E-03 |
| Local | 1.85E-04 | 2.89E-06 | 5.20E-05 | 1.16E-05 | 2.89E-06 | 11.3E-05 | 5.14E-03 | 3.78E-03 |
| Sonali | 2.95E-04 | 2.89E-06 | 9.24E-05 | 1.16E-05 | 2.89E-06 | 8.38E-05 | 3.93E-03 | 2.37E-03 |
| Mean | 2.17E-04 | 2.89E-06 | 6.50E-05 | 1.16E-05 | 2.89E-06 | 9.53E-05 | 4.87E-03 | 2.99E-03 |
| **Hen egg** | | | | | | | | |
| Layer | 2.31E-05 | 2.31E-06 | 6.94E-06 | 9.25E-06 | 2.31E-06 | 3.47E-05 | 2.98E-03 | 2.34E-03 |
| Local | 5.55E-05 | 2.31E-06 | 6.94E-06 | 9.25E-06 | 2.31E-06 | 3.47E-05 | 4.23E-03 | 2.71E-03 |
| Organic | 1.39E-05 | 2.31E-06 | 5.78E-06 | 9.25E-06 | 2.31E-06 | 3.47E-05 | 5.95E-03 | 2.87E-03 |
| Mean | 3.08E-05 | 2.31E-06 | 6.60E-06 | 9.25E-06 | 2.31E-06 | 3.47E-05 | 4.39E-03 | 2.64E-03 |
| MTDI | 3.50E-03a | 8.30E-04a | 8.30E-03a | 3.0E-03a | 5.7E-04a | 0.183b | 0.667b | 0.667b |
| MTDI = Maximum tolerable daily intake | | | | | | | | |
| aJAECA (Zheng et al., 2020) | | | | | | | | |
| bCNS (Zheng et al, 2020) | | | | | | | | |

**Table S7** Target hazard quotient of heavy metals from consumption of chicken meat and hen egg samples.

| Food items | Target hazard quotient (THQ) | | | | | | | | TTHQ |
| --- | --- | --- | --- | --- | --- | --- | --- | --- | --- |
| Pb | Cd | Cr | As | Hg | Mn | Fe | Zn |
| **Chicken meat** | | | | | | | | | |
| Broiler | 0.0487 | 0.0035 | 0.0059 | 0.0039 | 0.0051 | 0.0005 | 0.0083 | 0.0042 | 0.0801 |
| Local | 0.0528 | 0.0035 | 0.0063 | 0.0039 | 0.0051 | 0.0006 | 0.0077 | 0.0057 | 0.0855 |
| Sonali | 0.0842 | 0.0035 | 0.0111 | 0.0039 | 0.0051 | 0.0005 | 0.0059 | 0.0036 | 0.1176 |
| Mean | 0.0619 | 0.0035 | 0.0078 | 0.0039 | 0.0051 | 0.0005 | 0.0073 | 0.0045 | 0.0944 |
| **Hen egg** | | | | | | | | | |
| Layer | 0.0066 | 0.0028 | 0.0008 | 0.0031 | 0.0041 | 0.0002 | 0.0045 | 0.0035 | 0.0255 |
| Local | 0.0159 | 0.0028 | 0.0008 | 0.0031 | 0.0041 | 0.0002 | 0.0063 | 0.0041 | 0.0372 |
| Organic | 0.0040 | 0.0028 | 0.0007 | 0.0031 | 0.0041 | 0.0002 | 0.0089 | 0.0043 | 0.0280 |
| Mean | 0.0088 | 0.0028 | 0.0008 | 0.0031 | 0.0041 | 0.0002 | 0.0066 | 0.0039 | 0.0302 |

**Table S8**: Carcinogenic risk of heavy metals from consumption of chicken meat and hen egg samples.

| Food items | Carcinogenic risk (CR) | | | |
| --- | --- | --- | --- | --- |
| Pb | Cd | Cr | As |
| **Chicken meat** | | | | |
| Broiler | 1.45E-06 | 1.82E-05 | 2.46E-05 | 1.73E-05 |
| Local | 1.57E-06 | 1.82E-05 | 2.60E-05 | 1.73E-05 |
| Sonali | 2.50E-06 | 1.82E-05 | 4.62E-05 | 1.73E-05 |
| Mean | 1.84E-06 | 1.82E-05 | 3.23E-05 | 1.73E-05 |
| **Hen egg** | | | | |
| Layer | 1.97E-07 | 1.46E-05 | 3.47E-06 | 1.39E-05 |
| Local | 4.72E-07 | 1.46E-05 | 3.47E-06 | 1.39E-05 |
| Organic | 1.18E-07 | 1.46E-05 | 2.89E-06 | 1.39E-05 |
| Mean | 2.62E-07 | 1.46E-05 | 3.28E-06 | 1.39E-05 |

**References**

Zheng, L., Zhang, Q., Li, Z., Sun, R., Zhong, G., 2020. Exposure risk assessment of nine metal elements in Chongqing hotpot seasoning. RSC Adv. 10, 1971–1980.
